# Supplementary material for: Janus MoAZ3H (A = Ge, Si; Z = N, P, As) monolayers: a new class of semiconductors exhibiting excellent photovoltaic and catalytic performances
Source: Royal Society of Chemistry journal article supplement (doi:10.1039/d3cp02622a), 2023-01-01
Supplement: d3cp02622a1.pdf [file d3cp02622a1.pdf]

## Supporting Materials

### Janus $\text{MoAZ}_3\text{H}$ ( $\text{A}=\text{Ge}, \text{Si}; \text{Z}=\text{N}, \text{P}, \text{As}$ ) monolayers: a new class of semiconductors exhibiting excellent photovoltaic and catalytic performances

Xiaolin Cai<sup>1\*</sup>, Guoxing Chen<sup>1</sup>, Rui Li<sup>1</sup>, Weiyang Yu<sup>1</sup>, Xuefeng Yang<sup>1</sup>, Yu Jia<sup>2,3\*</sup>

<sup>1</sup>School of Physics and Electronic Information Engineering, Henan Polytechnic University, Jiaozuo 454000, China

<sup>2</sup>Key Laboratory for Special Functional Materials of Ministry of Education, Collaborative Innovation Center of Nano Functional Materials and Applications, School of Material Science and Engineering, Henan University, Kaifeng 475004, China

<sup>3</sup>International Laboratory for Quantum Functional Materials of Henan, and School of Physics and Microelectronics, Zhengzhou University, Zhengzhou 450001, China

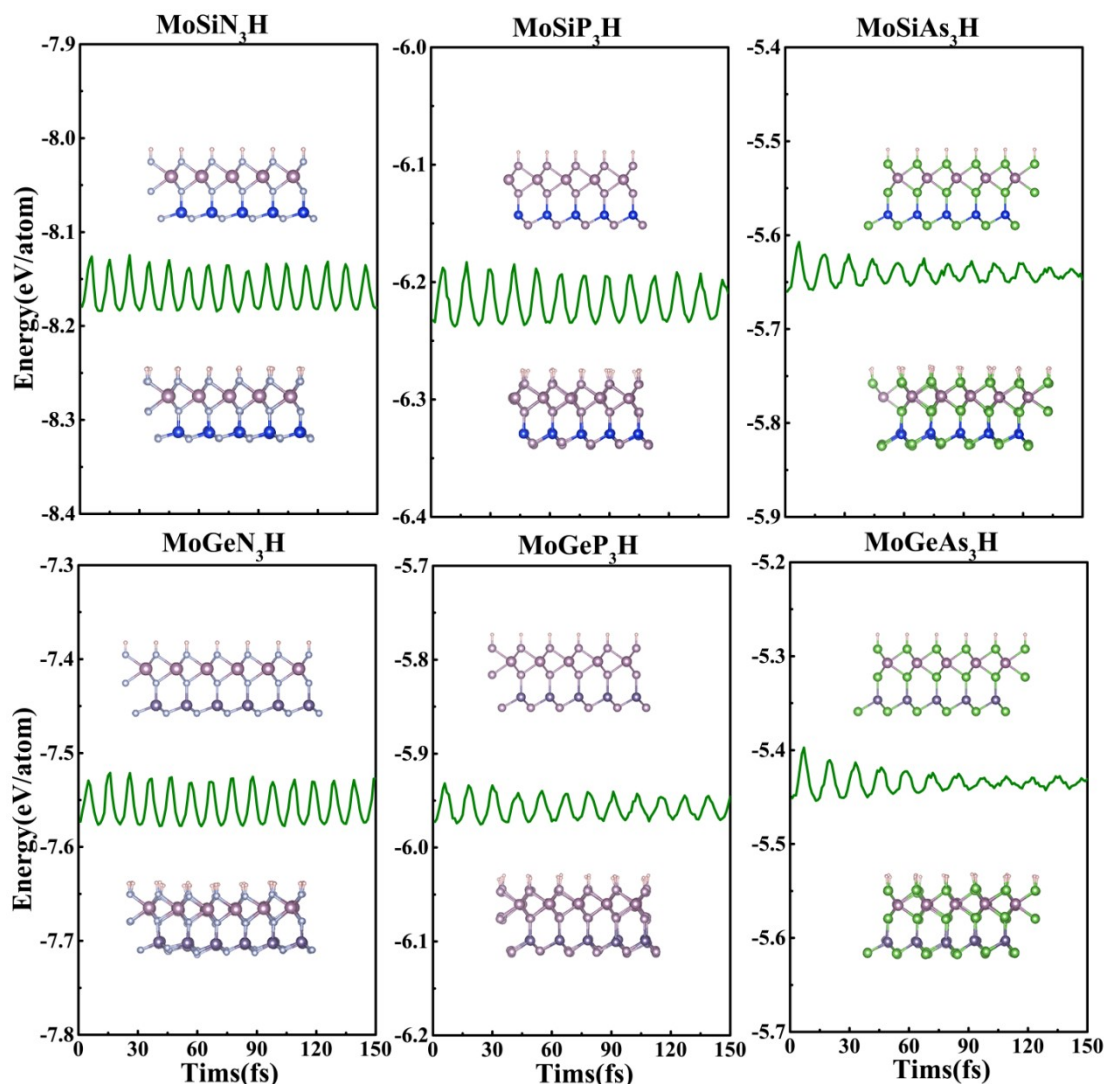

**Fig. S1** AIMD simulation of  $\text{MoAZ}_3\text{H}$  ML material, in which the green curve is the evolution of the energy per atom over time, and the top and bottom insets are the initial and final structures,

respectively.

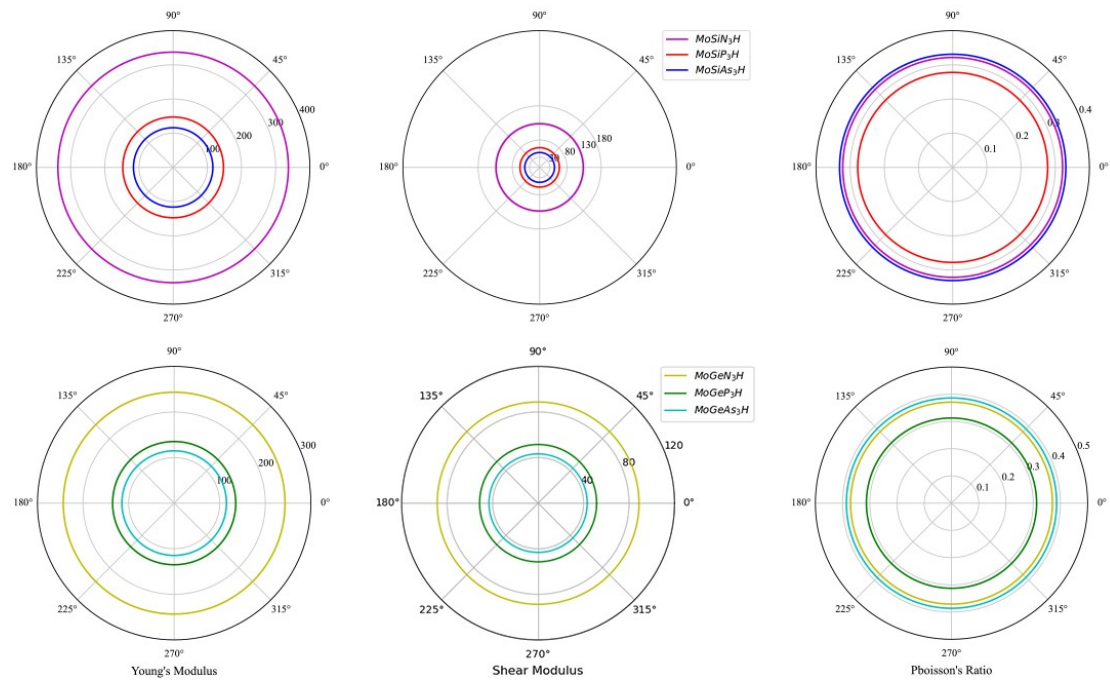

**Fig. S2** Polar diagrams of Young's modulus, shear modulus and Poisson ratio of MoAZ<sub>3</sub>H ML.

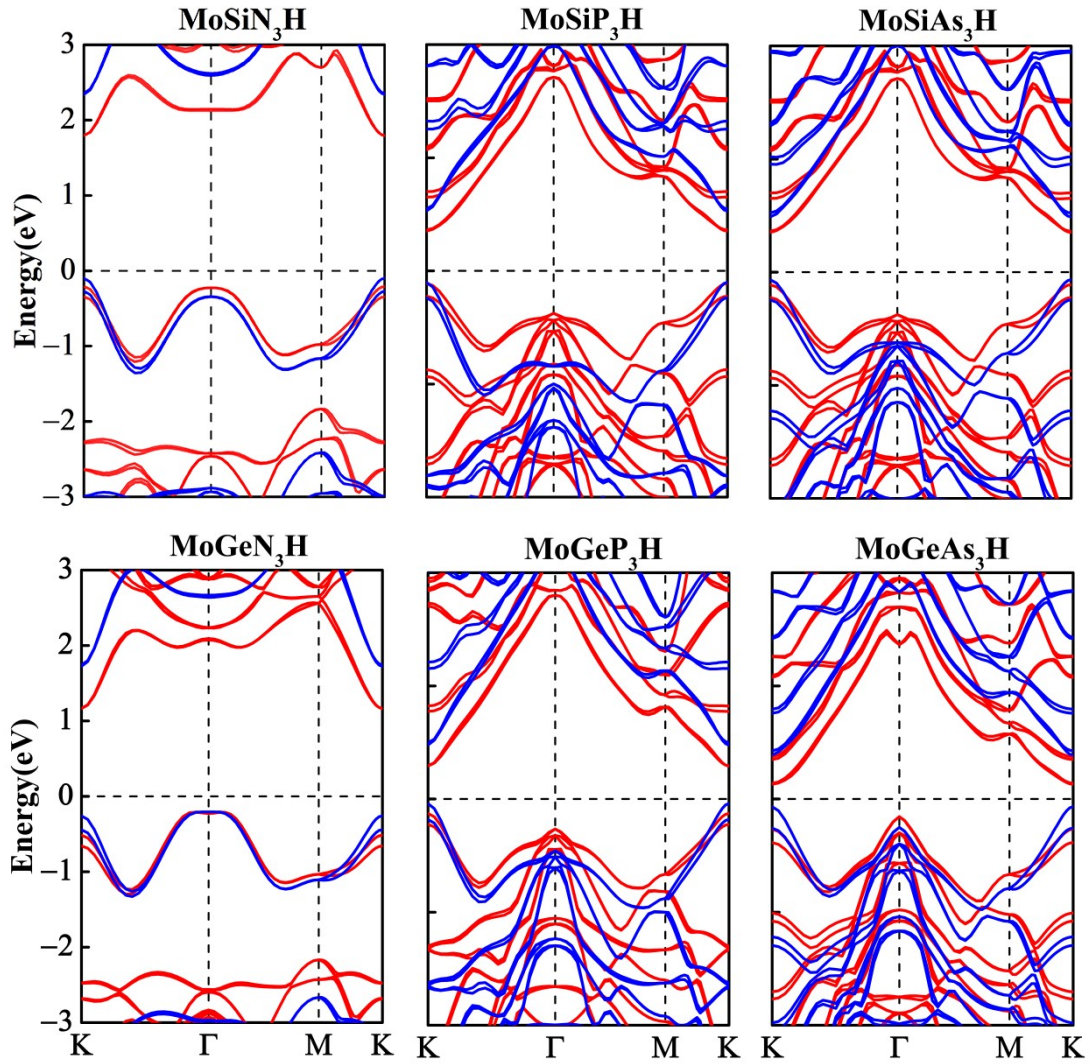

**Fig. S3** Band structure diagram of MoAZ<sub>3</sub>H ML calculated by PBE+SOC (red lines) and HSE+SOC (blue lines) functionals, with Fermi energy level set to 0.

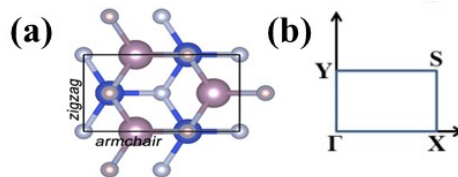

**Fig. S4** (a) Top view of the rectangular unit cell and (b) the corresponding high symmetry path in the Brillouin zone for the MoAZ<sub>3</sub>H ML.

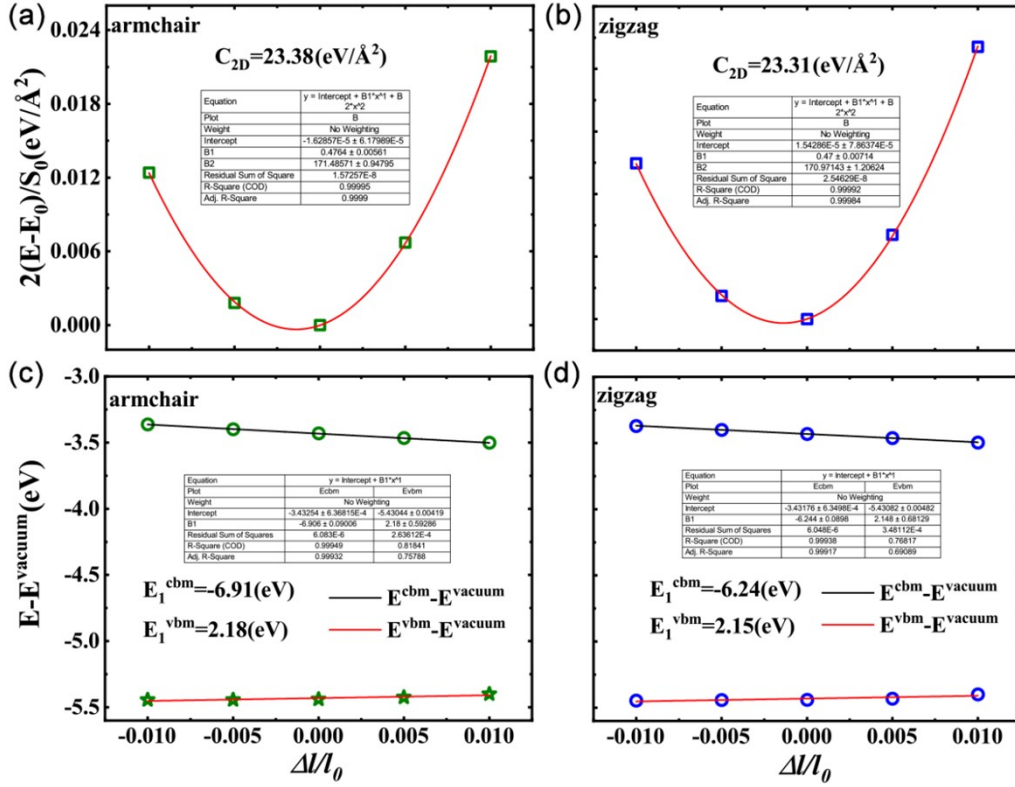

Fig. S5 In-plane stiffness and deformation potential of the MoSiN<sub>3</sub>H ML obtained from the PBE+SOC scheme.

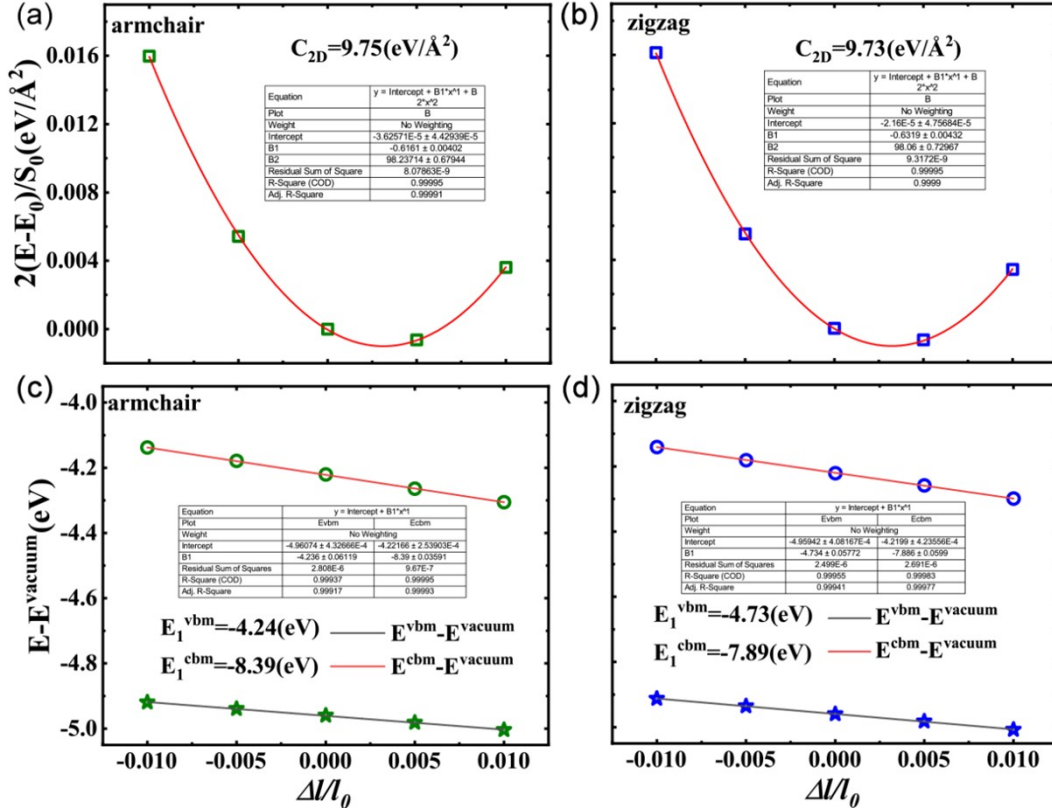

Fig. S6 In-plane stiffness and deformation potential of the MoSiP<sub>3</sub>H ML obtained from the PBE+SOC scheme.

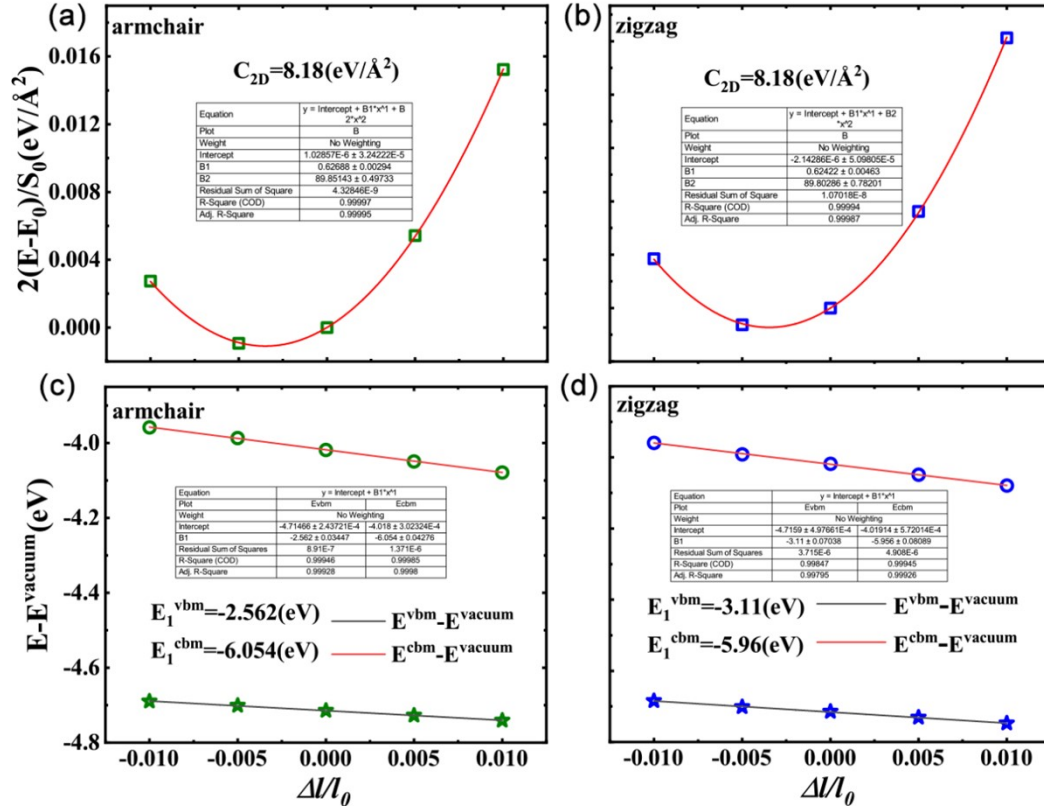

**Fig. S7** In-plane stiffness and deformation potential of the MoSiAs<sub>3</sub>H ML obtained from the PBE+SOC scheme.

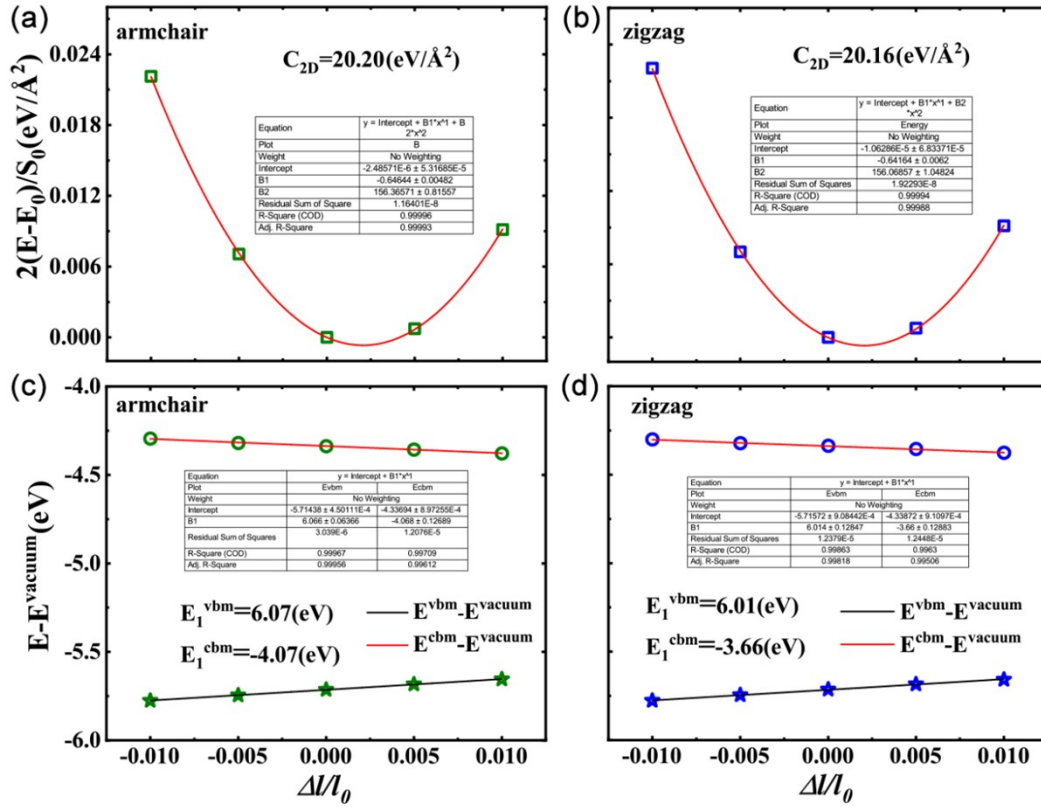

**Fig. S8** In-plane stiffness and deformation potential of the MoGeN<sub>3</sub>H ML obtained from the PBE+SOC scheme.

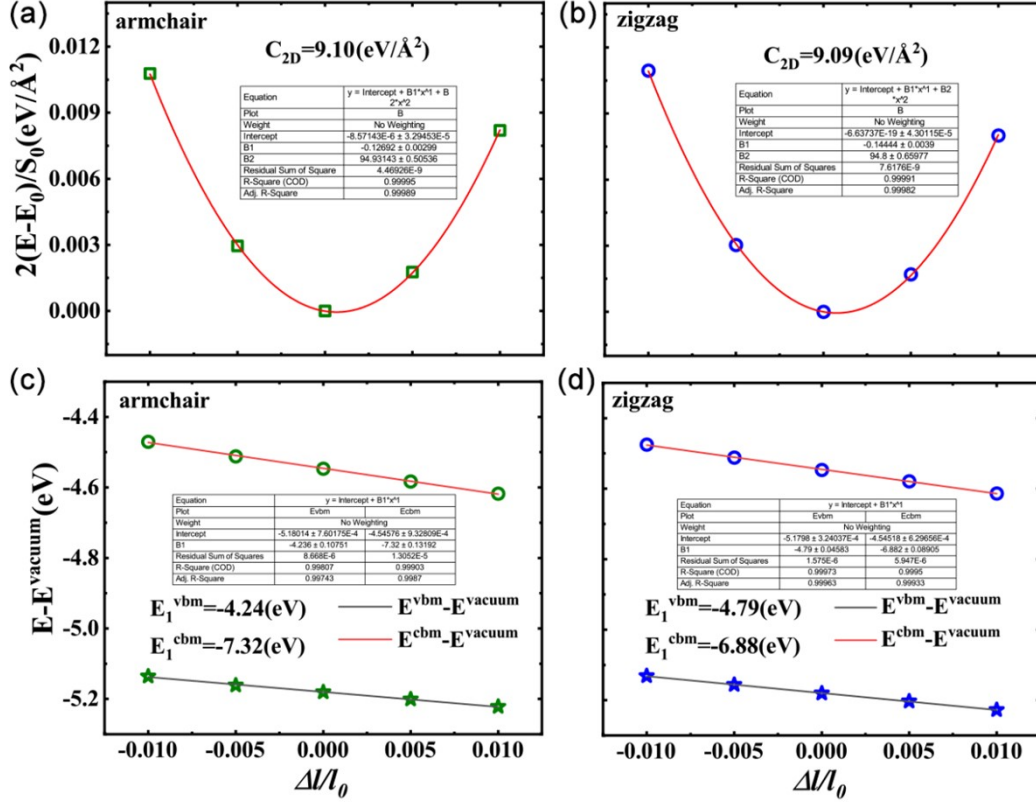

Fig. S9 In-plane stiffness and deformation potential of the MoGeP<sub>3</sub>H ML obtained from the PBE+SOC scheme.

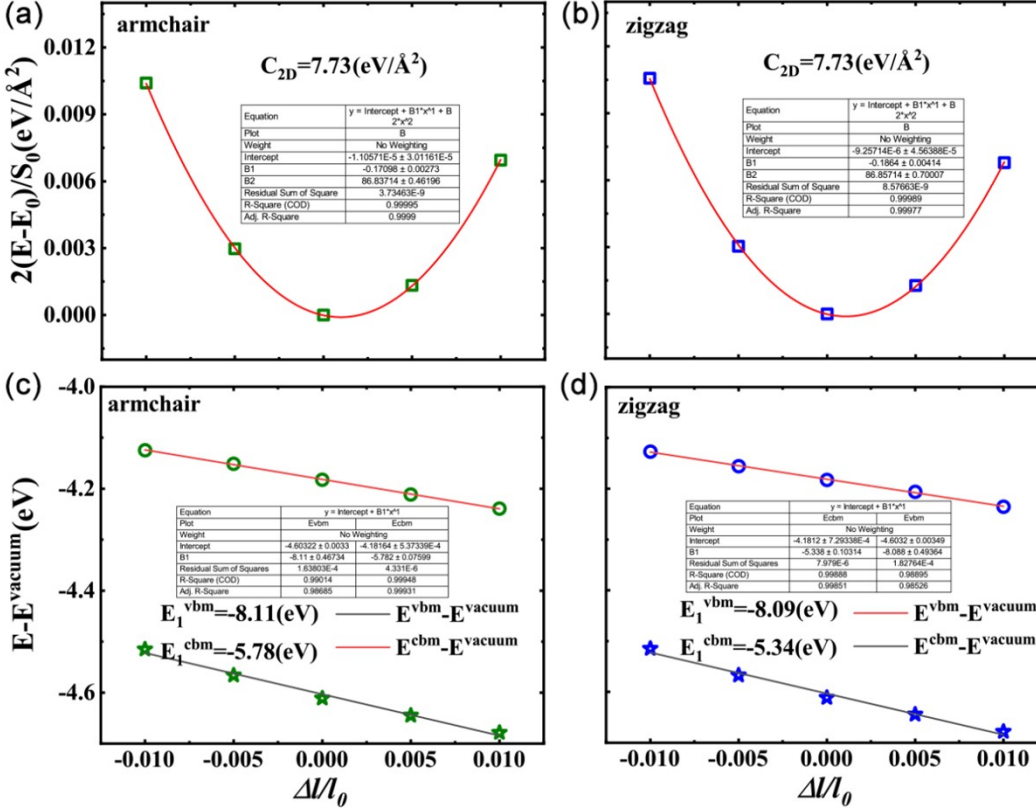

Fig. S10 In-plane stiffness and deformation potential of the MoGeAs<sub>3</sub>H ML obtained from the PBE+SOC scheme.
